# Supplementary material
Source: PubMed Central journal article supplement (PMC3736099)
Supplement: NIHMS52591-supplement-1.pdf [file NIHMS52591-supplement-1.pdf]

## Supplementary Information

### Mapping G-Quadruplex structures in the genome

Enid Yi Ni Lam<sup>1</sup>, Dario Beraldi<sup>1</sup>, David Tannahill<sup>1</sup> and Shankar Balasubramanian<sup>1,2,3\*</sup>

#### Author Affiliations:

<sup>1</sup> Cancer Research UK Cambridge Institute, University of Cambridge, Li Ka Shing Centre, Robinson Way, Cambridge, UK

<sup>2</sup> The University Chemical Laboratory, University of Cambridge, Lensfield Road, Cambridge, UK

<sup>3</sup> School of Clinical Medicine, University of Cambridge, Cambridge, UK

\* To whom correspondence should be addressed.

Email: sb10031@cam.ac.uk

## Supplementary Results

**Supplementary Figure S1** The hf2 single chain antibody binds G-quadruplex-structured oligonucleotides.

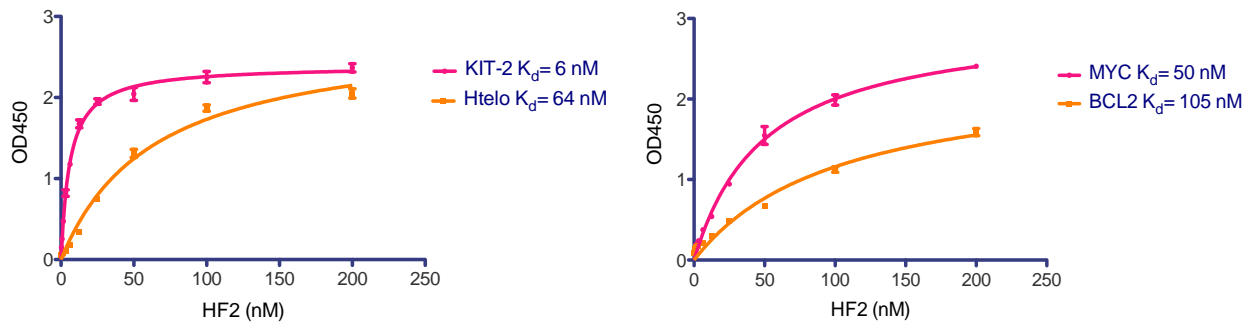

Binding curves as determined by ELISA for hf2 and different G-quadruplex oligonucleotides folded into a G-quadruplex structure. The dissociation constants ( $K_d$ ) are indicated.

**Supplementary Figure S2** Pull-down of a variety of G-quadruplex-structured oligonucleotides by the hf2 single chain antibody.

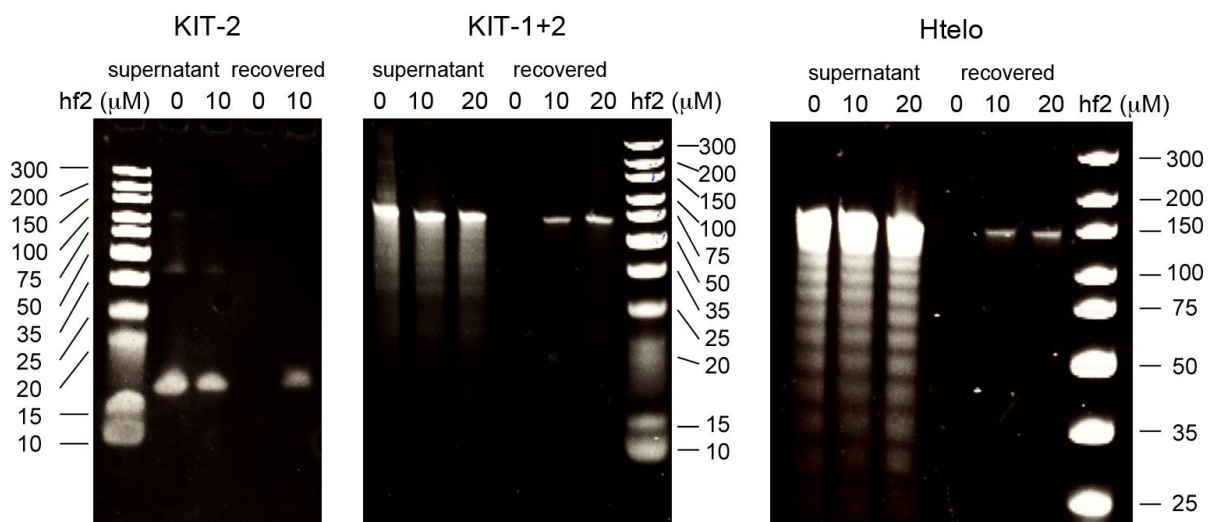

DNA recovered after binding to hf2 and unbound DNA (supernatant) analyzed on TBE-urea gels. The oligonucleotides KIT-2 (left), KIT-1+2 (middle) and Htelo (right) are pulled down by hf2. Molecular weight size markers are indicated.

**Supplementary Figure S3** Full images of gels shown in Figure 1 and Supplementary Figure S2.

The portion of gels displayed in Figure 1 and Supplementary Figure S2 are indicated by the black line.

Molecular weight size markers are indicated.

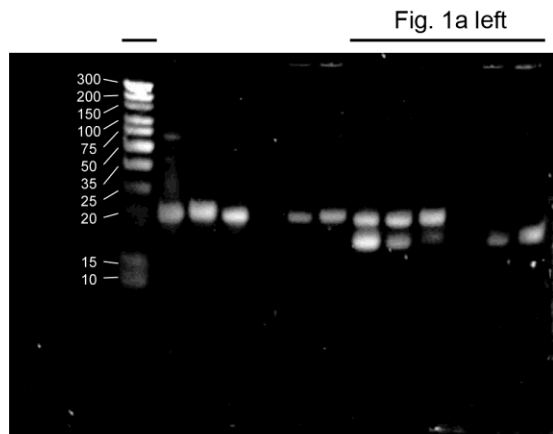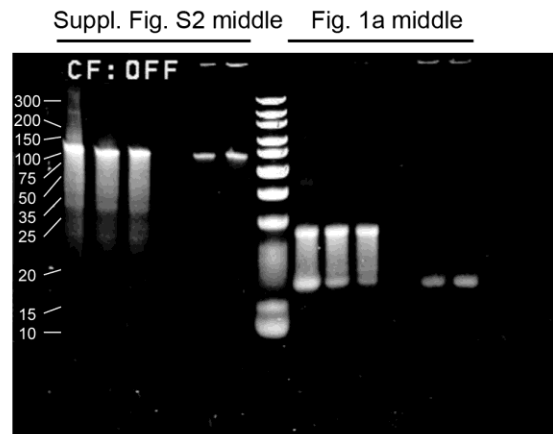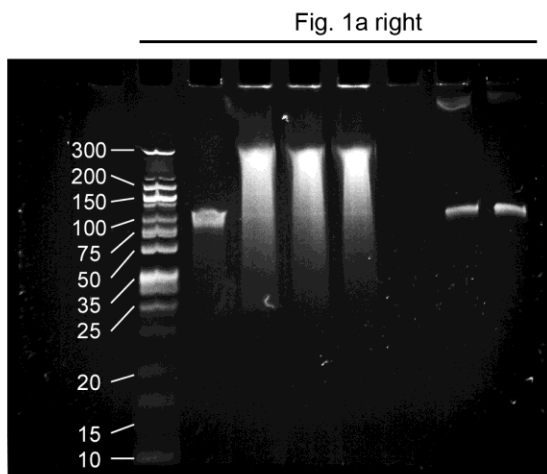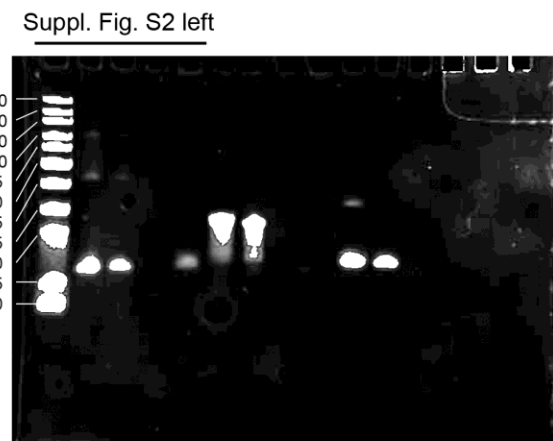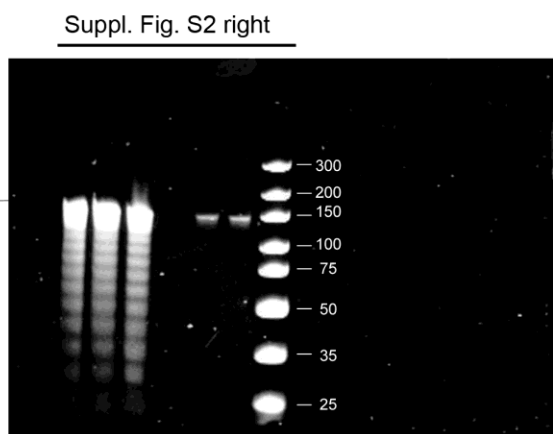

**Supplementary Figure S4** Sonication does not induce or destroy G-quadruplex structures.

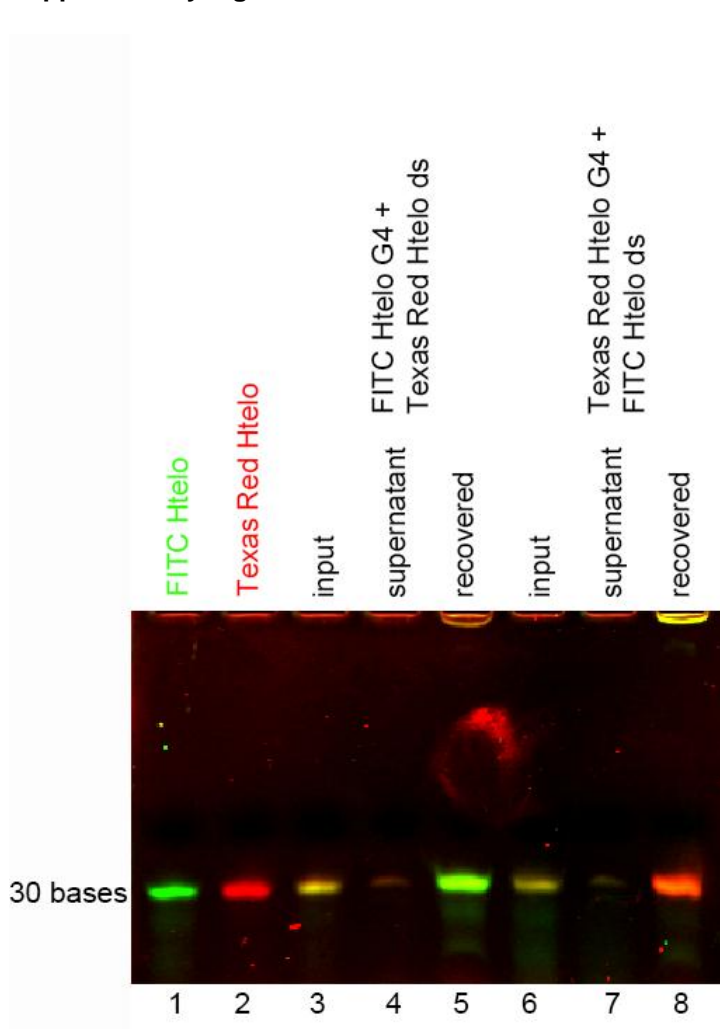

Mixtures of pre-folded G-quadruplex-structured (G4), and double-stranded (ds) fluorescent oligonucleotides were sonicated, prior to pull-down with hf2. Analysis by urea-PAGE confirms that the sonication procedure does not affect the pre-folded G-quadruplex oligonucleotide structure nor induce G-quadruplex formation from the double-stranded oligonucleotide.

Lane 1, FITC Htelo oligonucleotide folded into a G4 structure alone, size control.

Lane 2, Texas Red Htelo oligonucleotide folded into a G4 structure alone, size control.

Lanes 3-5, Hf2 pull-down of a mixture of pre-folded FITC Htelo G4 oligonucleotide and pre-folded Texas Red Htelo ds oligonucleotide after sonication- only the FITC Htelo oligo pre-folded into a G-quadruplex is recovered, while the Texas Red oligonucleotide pre-folded into ds is not recovered.

Lanes 6-8, Pull-down of a mixture of Texas Red Htelo G4 oligonucleotide and FITC Htelo ds oligonucleotide after sonication- only the Texas Red Htelo oligonucleotide pre-folded into a G-quadruplex is recovered, but not the FITC Htelo pre-folded ds oligonucleotide.

**Supplementary Figure S5** Qiagen DNA extraction buffers do not destroy or induce G-quadruplex structures.

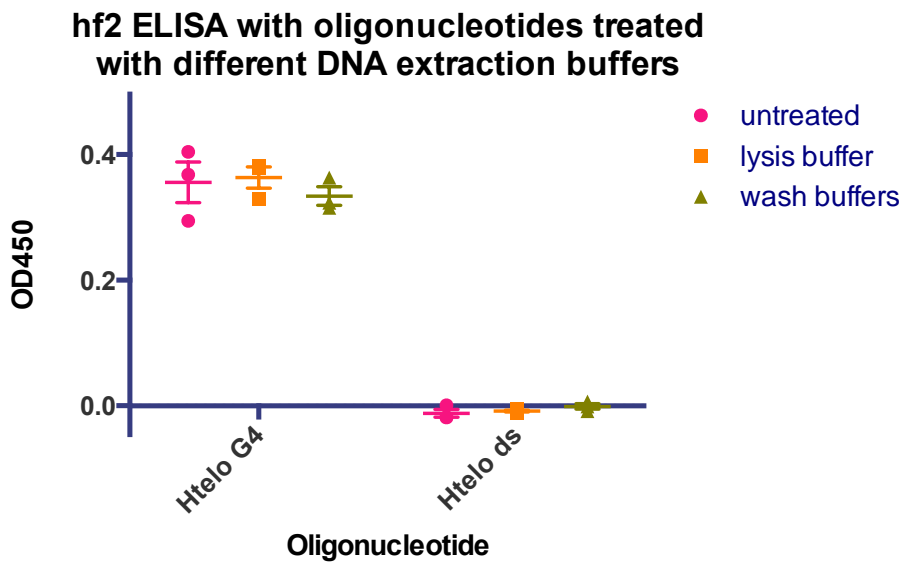

ELISA with biotinylated Htelo oligonucleotides either annealed in K<sup>+</sup> buffer into G-quadruplex structure or annealed with the complementary strand in buffer without K<sup>+</sup> into duplex structure. After binding of oligonucleotides to streptavidin-coated plates, the wells were treated in triplicate with either the lysis buffer (Qiagen buffer AL) for 10 minutes, or the two wash buffers (AW1 and AW2) sequentially for 5 minutes each. Three wells were left untreated as a control. After treatment with the buffers, an ELISA was performed with hf2 at its determined  $K_d$  concentration (64nM). The mean and standard error are plotted. Treatment of the Htelo G-quadruplex oligonucleotides with buffers used during genomic DNA isolation does not disrupt the G-quadruplex structure, and does not induce its formation from duplex DNA.

**Supplementary Figure S6** Pair-wise comparison of the peaks called between the four libraries to assess their consistency between replicates.

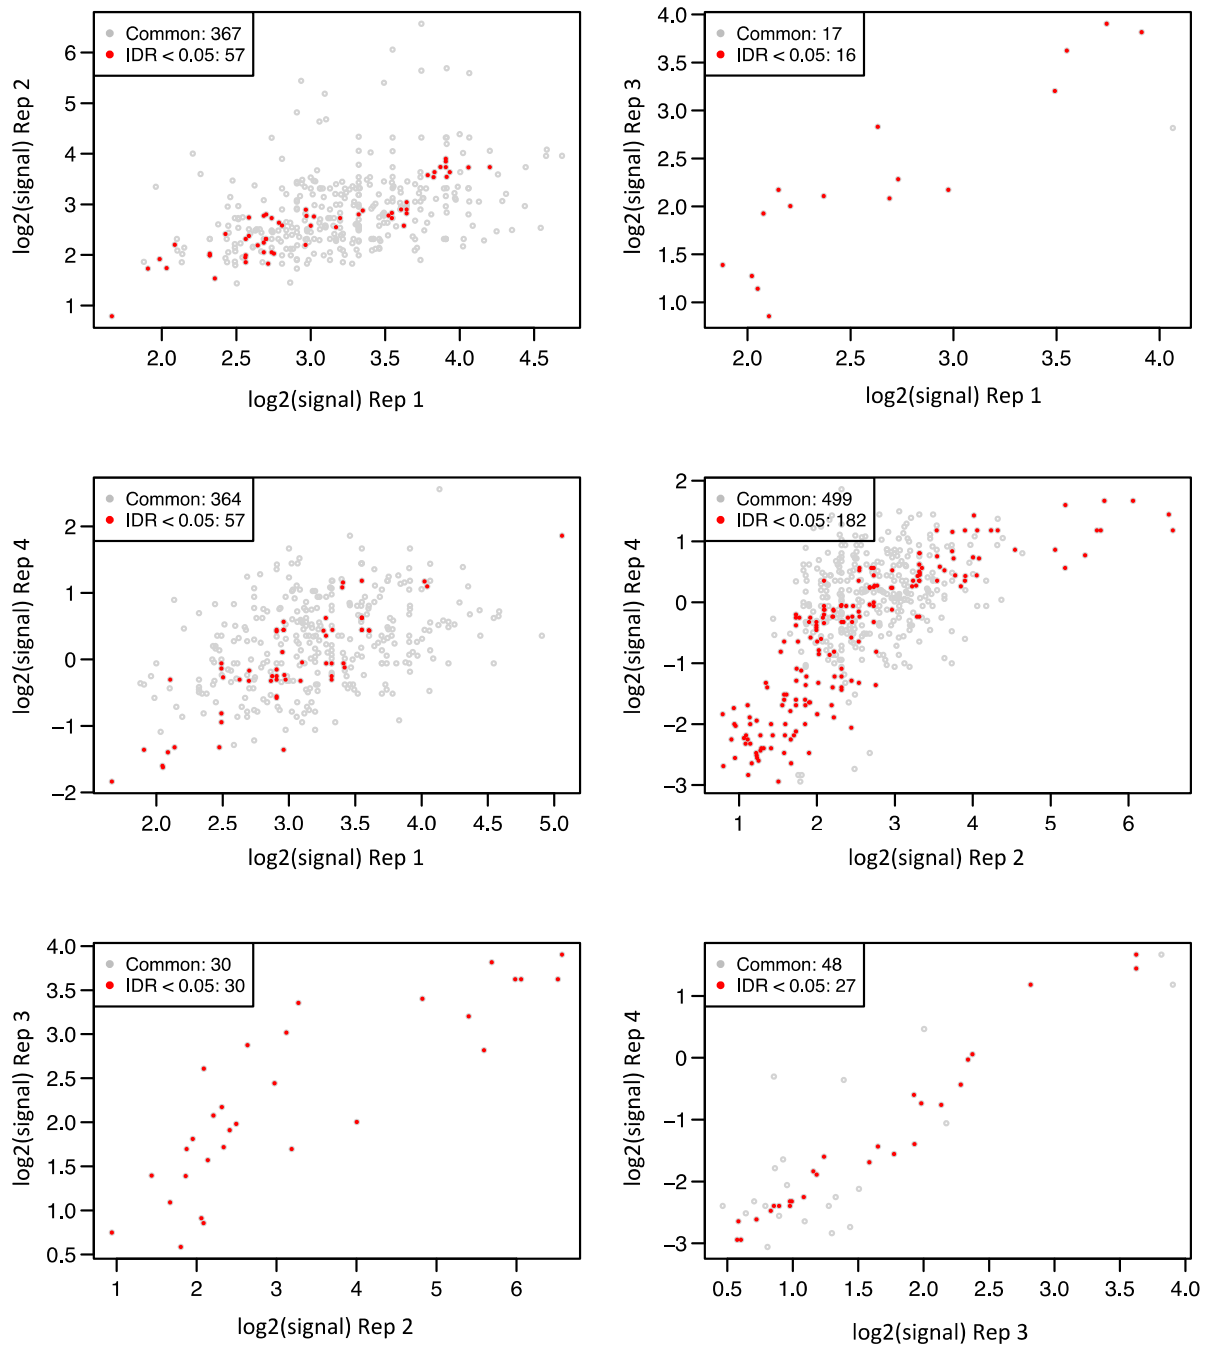

The enrichment of the peaks in common between each pair of libraries were plotted and the peaks with an irreproducible discovery rate (IDR) of 0.05 (IDR<sup>56</sup>) are highlighted in red, while peaks with an IDR of greater than 0.05 are plotted in grey.

**Supplementary Figure S7** Statistical significant enrichment of G4-calculator PQS in the hf2 pull-down peaks.

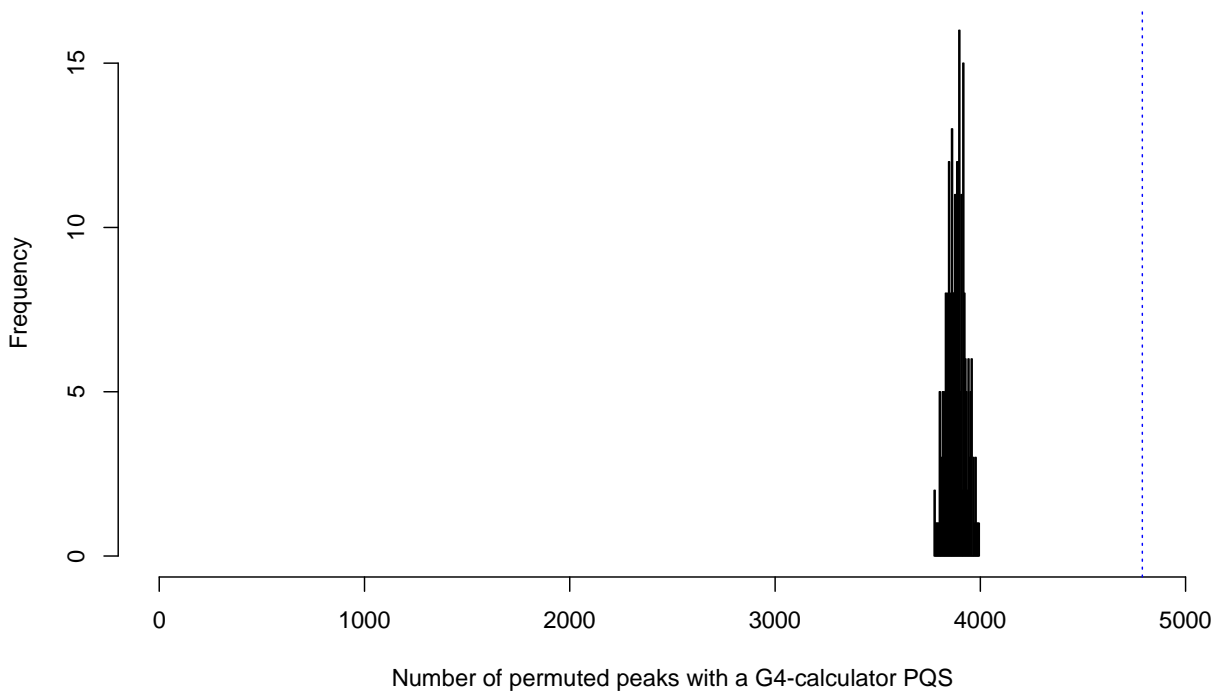

The histogram shows the number of peaks containing a G-quadruplex motif in random sequences compared with the 4789 observed number of pull-down peaks containing a G-quadruplex (blue line). Simulation was used to estimate the number of peaks containing a PQS by chance, that is, if peaks were unrelated to G-quadruplexes. For 250 times, the peaks on each chromosome were shuffled (thus maintaining the number of peaks and their size on each chromosome unchanged) and the number of peaks containing a G-quadruplexes computed. On average, 3885 peaks had a PQS (sd= 44.6) therefore the observed number of G-quadruplex-containing peaks is significantly larger (by 20.3 standard deviations) than expected by chance.



**Supplementary Figure S8** Prevalence of G4 calculator predicted G-quadruplex motifs compared to peak rank order.

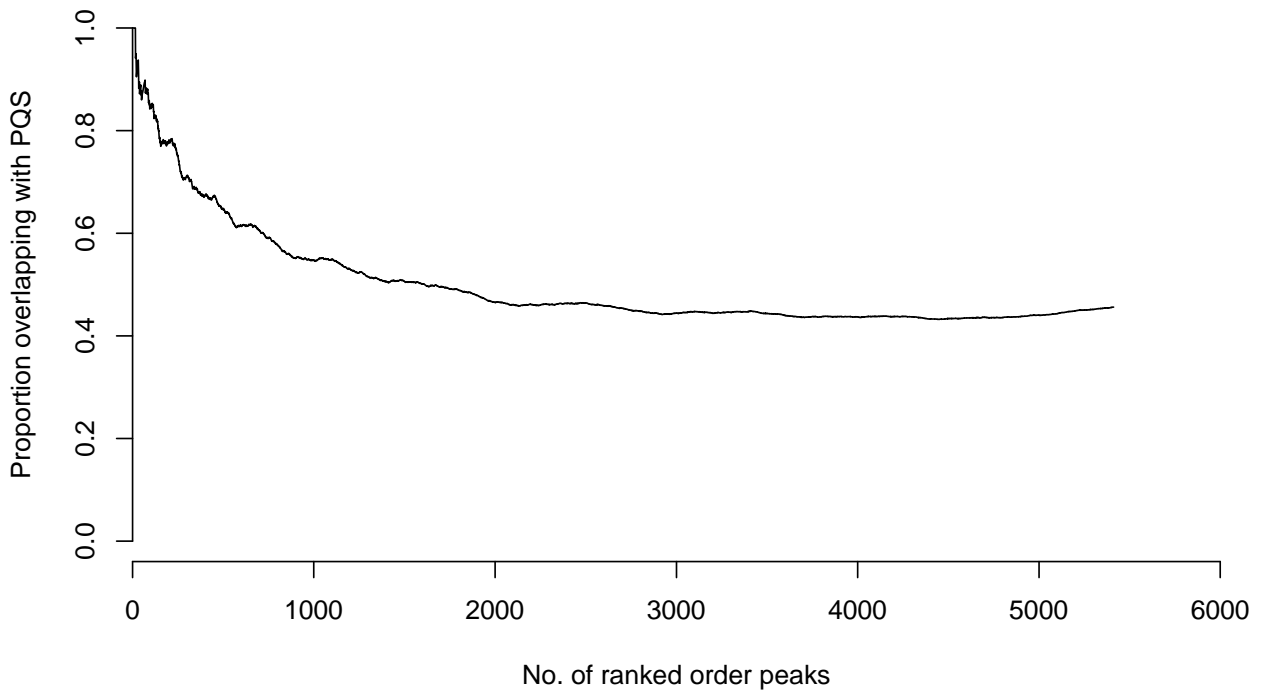

After normalizing for sequencing depth, reads for all libraries were combined and the resulting peaks ranked by enrichment over input were analyzed with G4 calculator. The proportion of the peaks overlapping with a G4 calculator predicted PQS is plotted for increasing numbers of ranked order peaks. This shows that PQS are most prevalent in approximately the top 500 enriched peaks.

**Supplementary Figure S9** Statistical significant enrichment of G-quadruplex motifs in the hf2 pull-down peaks.

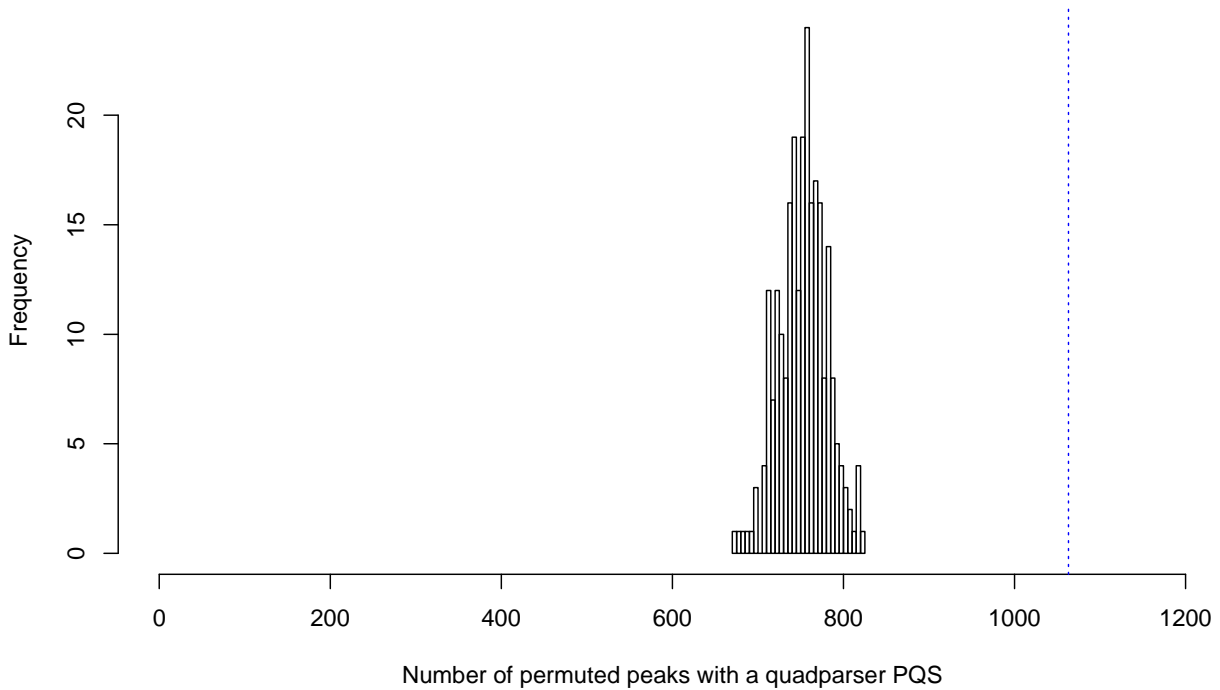

The histogram shows the number of peaks overlapping with a G-quadruplex motif in random sequences compared with the 1063 observed number of pull-down peaks containing a G-quadruplex (blue line). Simulation was used to estimate the number of peaks containing a PQS by chance, that is, if peaks were unrelated to G-quadruplexes. For 500 times, the peaks on each chromosome were shuffled (thus maintaining the number of peaks and their size on each chromosome unchanged) and the number of peaks overlapping a G-quadruplexes computed. On average, 755 peaks had a PQS (sd=27.6) therefore the observed number of G-quadruplex-containing peaks is significantly larger (by 11.1 standard deviations) than expected by chance.

**Supplementary Figure S10** Prevalence of G-quadruplex motifs compared to peak rank order.

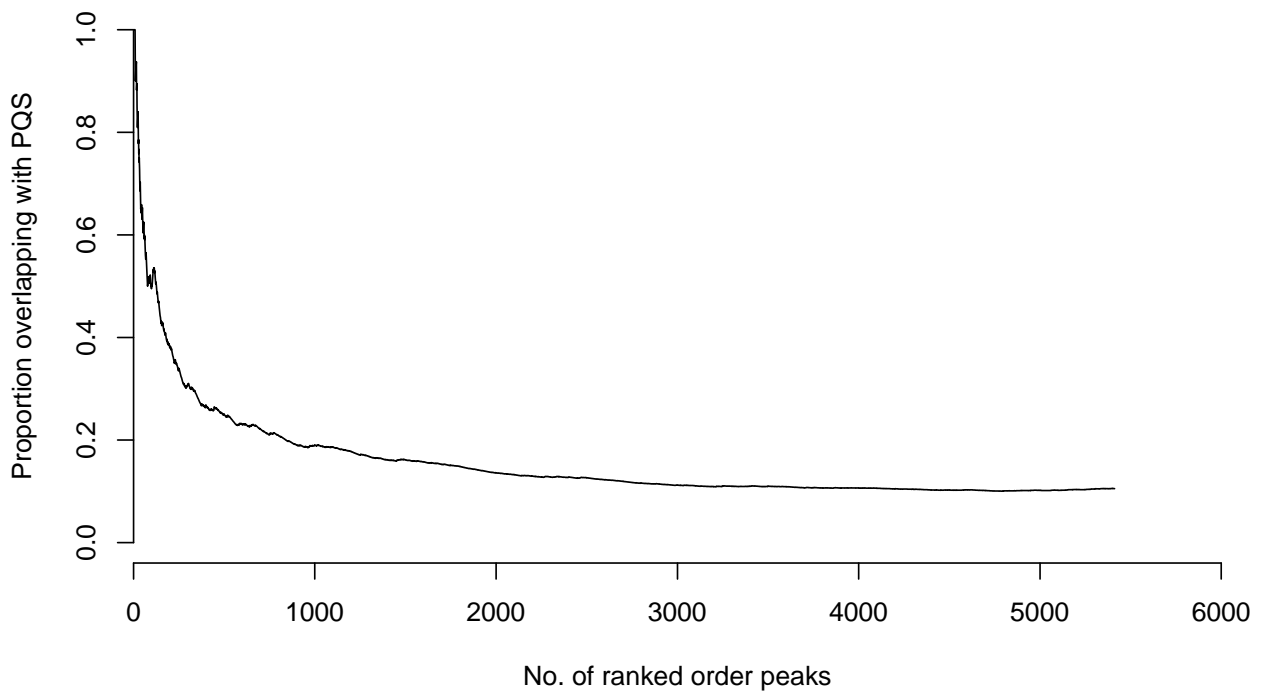

After normalizing for sequencing depth, reads for all libraries were combined and the resulting peaks ranked by enrichment over input were analyzed by *quadparser* for overlap with PQS. The proportion of the peaks overlapping with a PQS is plotted for increasing numbers of ranked order peaks. This shows that PQS are most prevalent in the top 200-300 enriched peaks.

**Supplementary Figure S11** High resolution view of the Peaks identified by hf2 pull-down in **Figure 2**.

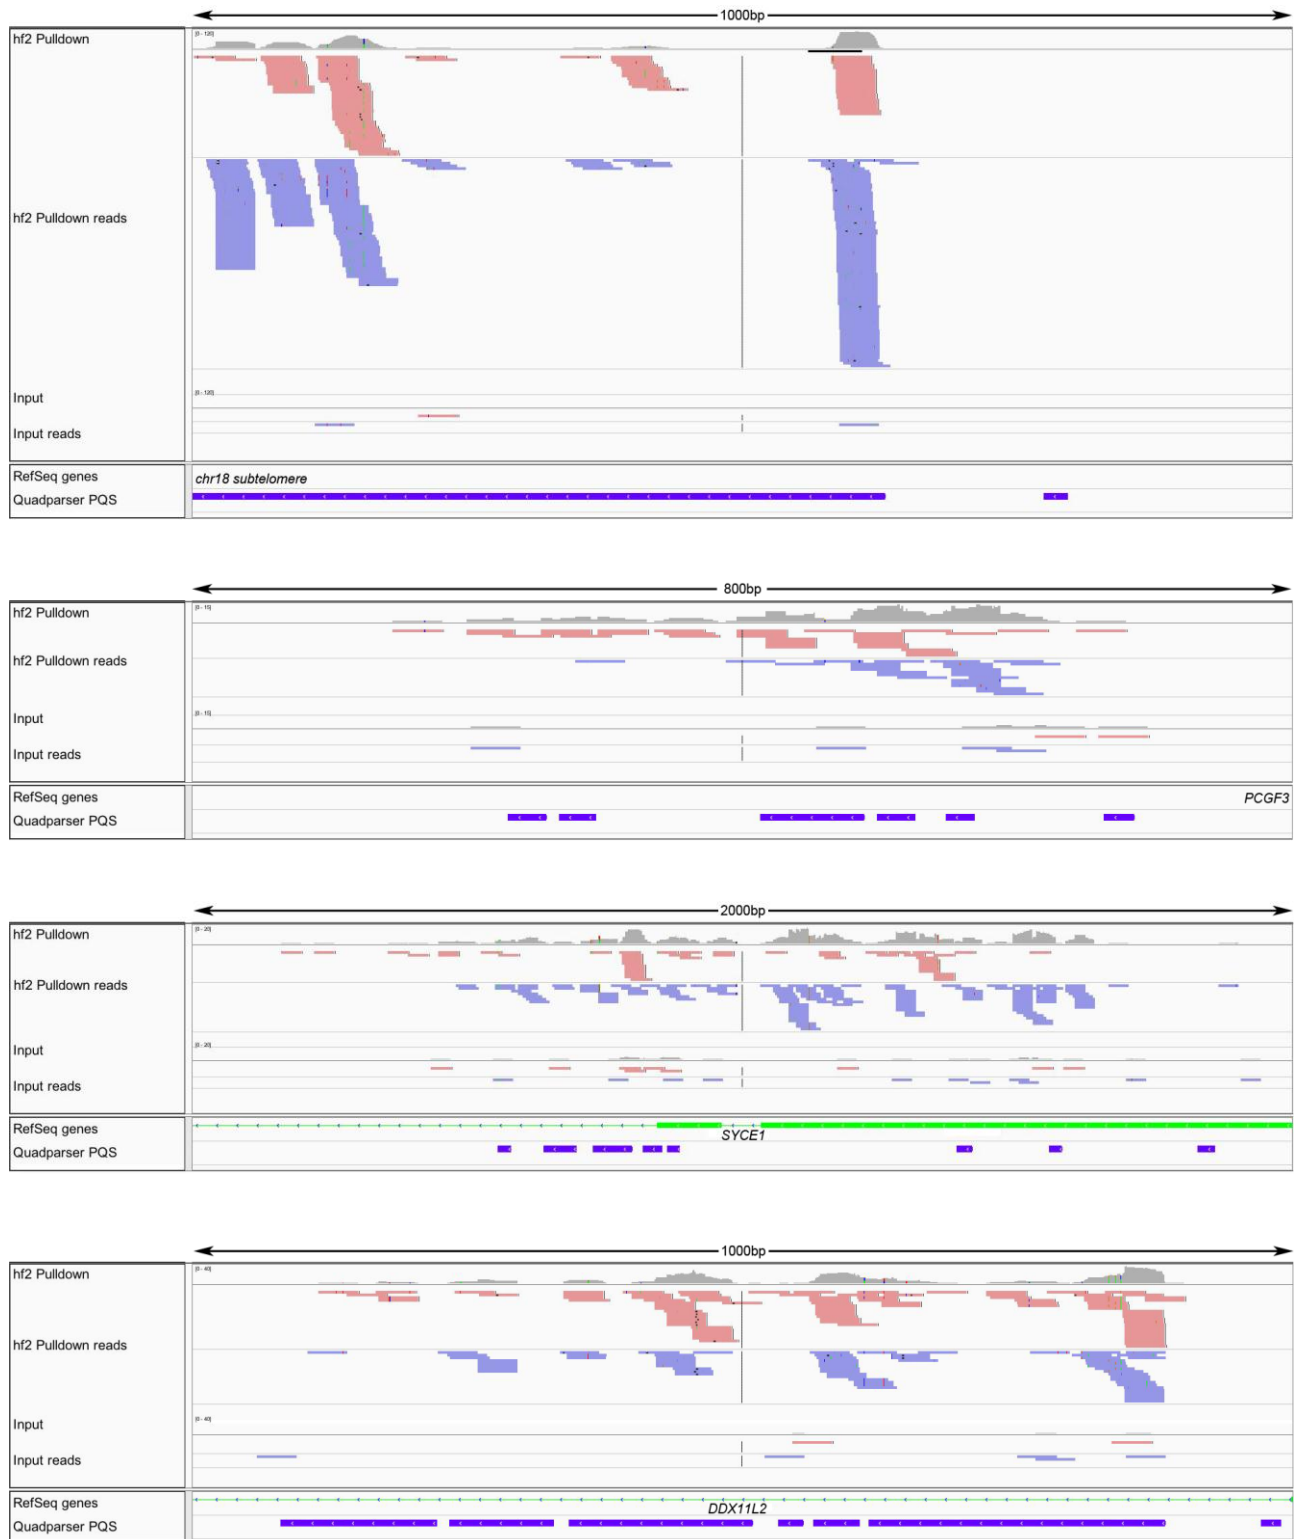

Genome browser view of the four peaks (grey) showing the reads mapping to the two strands separately in red and blue, respectively. RefSeq genes and quadparser PQS are shown in green and purple, respectively.

**Supplementary Figure S12** Motif analysis of the enriched peaks by MEME.

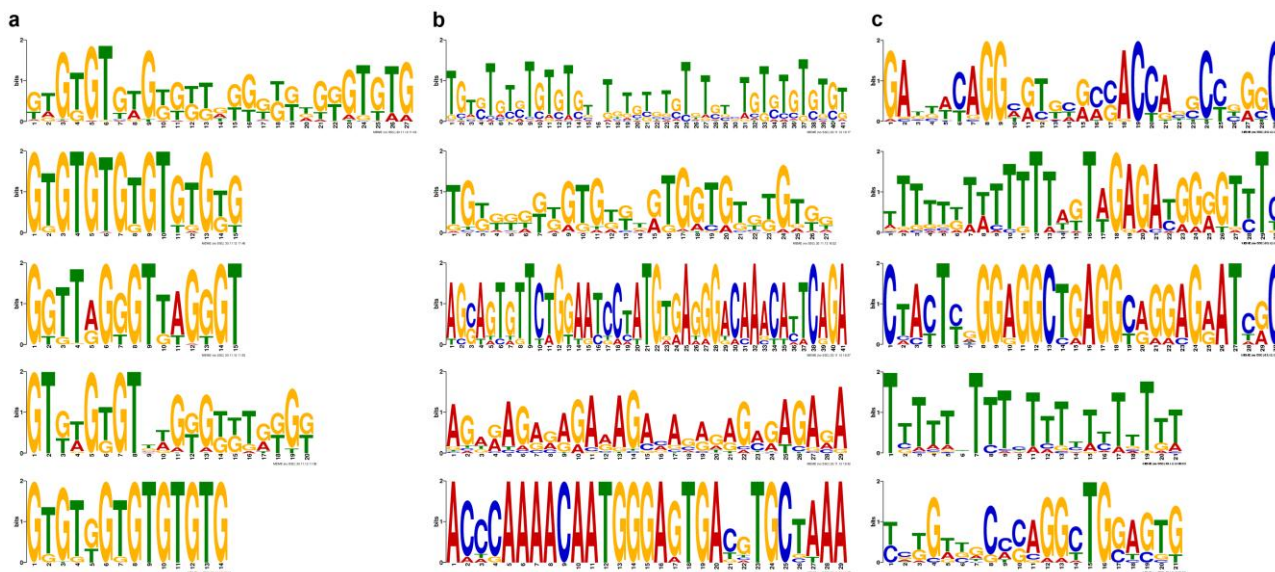

(a) The top five most enriched motifs by MEME of the 200 peaks with the highest enrichment over input in the combined hf2 pull-down library. (b) The top five most enriched motifs by MEME of the 200 peaks with the highest enrichment called in the input library. (c) The top five most enriched motifs by MEME of 200 sequences randomly selected from the genome. The G-rich strand is shown for all motifs to allow comparison.

**Supplementary Figure S13** Circular dichroism spectra of 44 oligonucleotides containing sequences from four peaks indicated above and folded into a G-quadruplex in the presence of  $K^+$ .

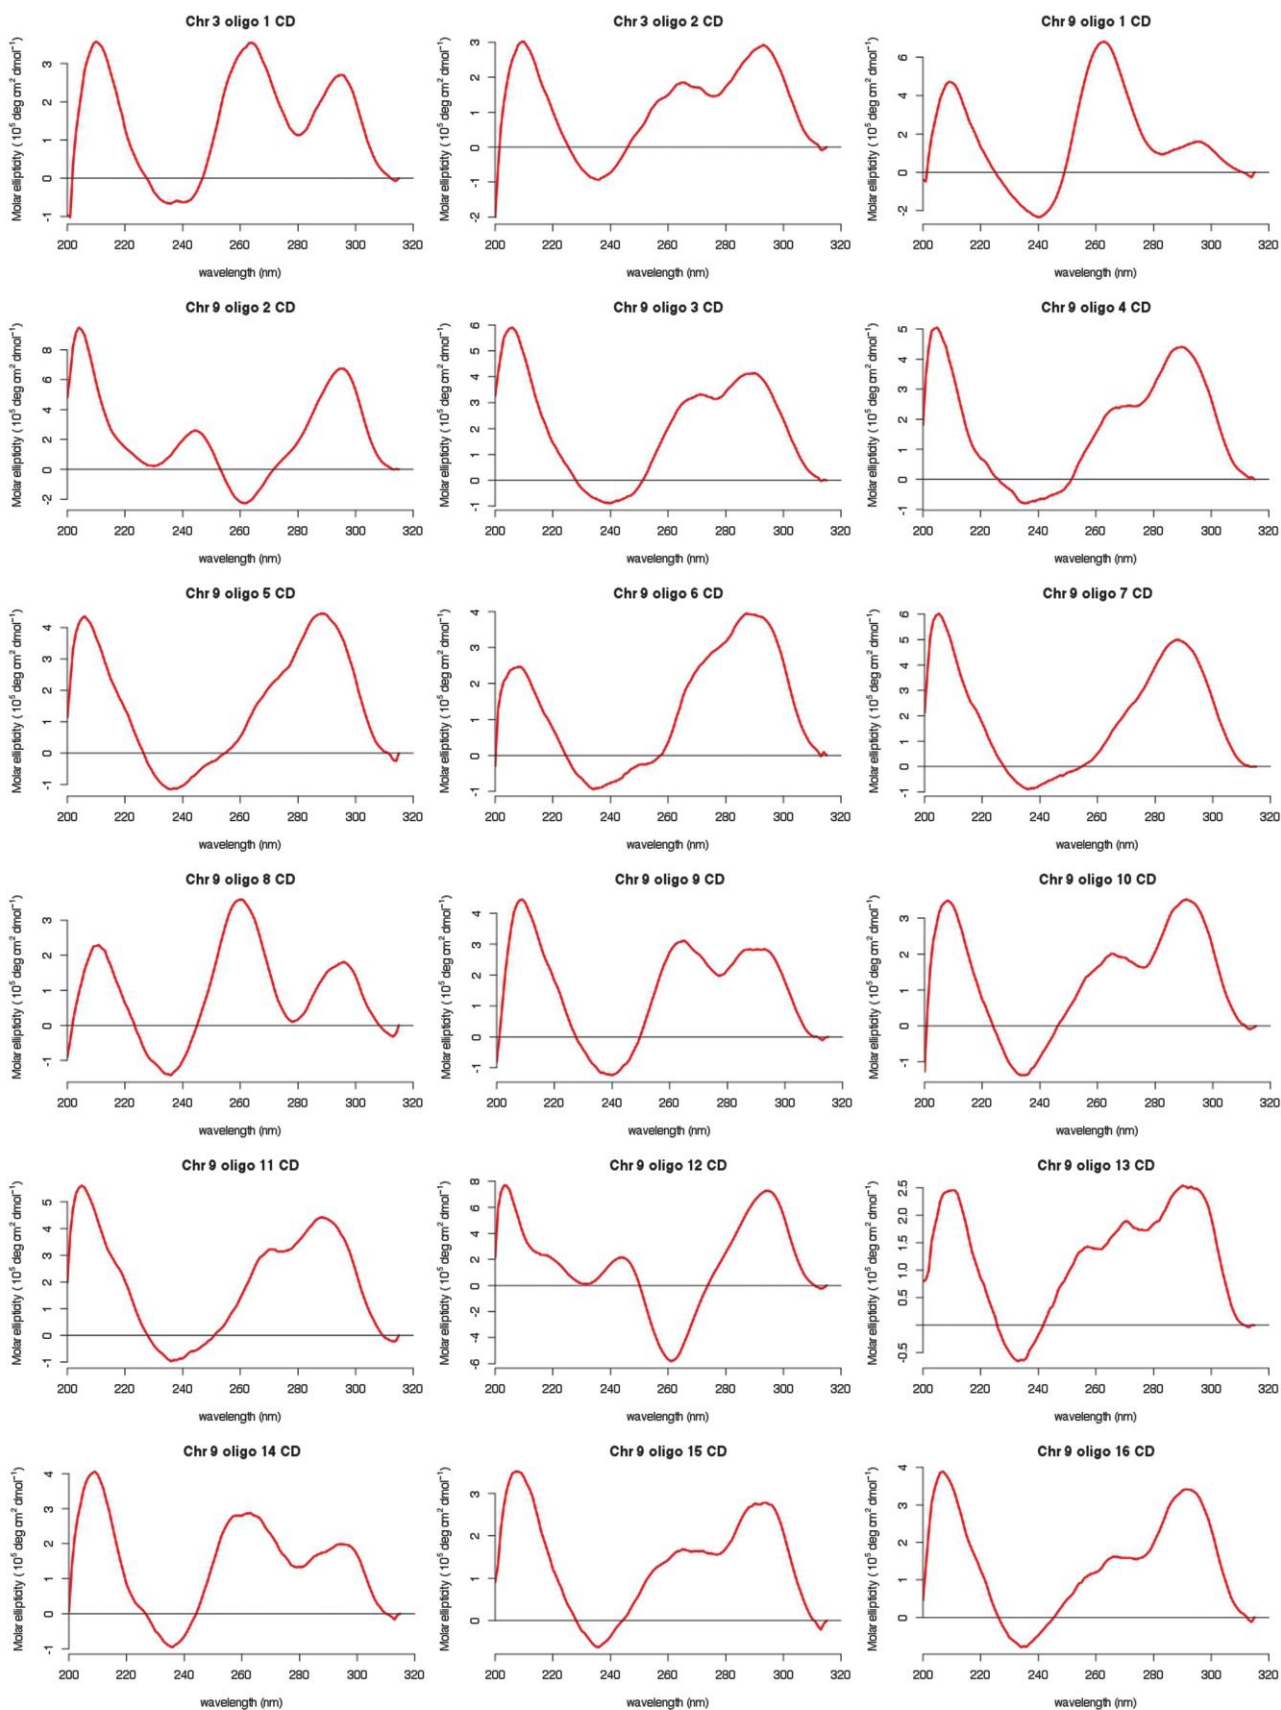

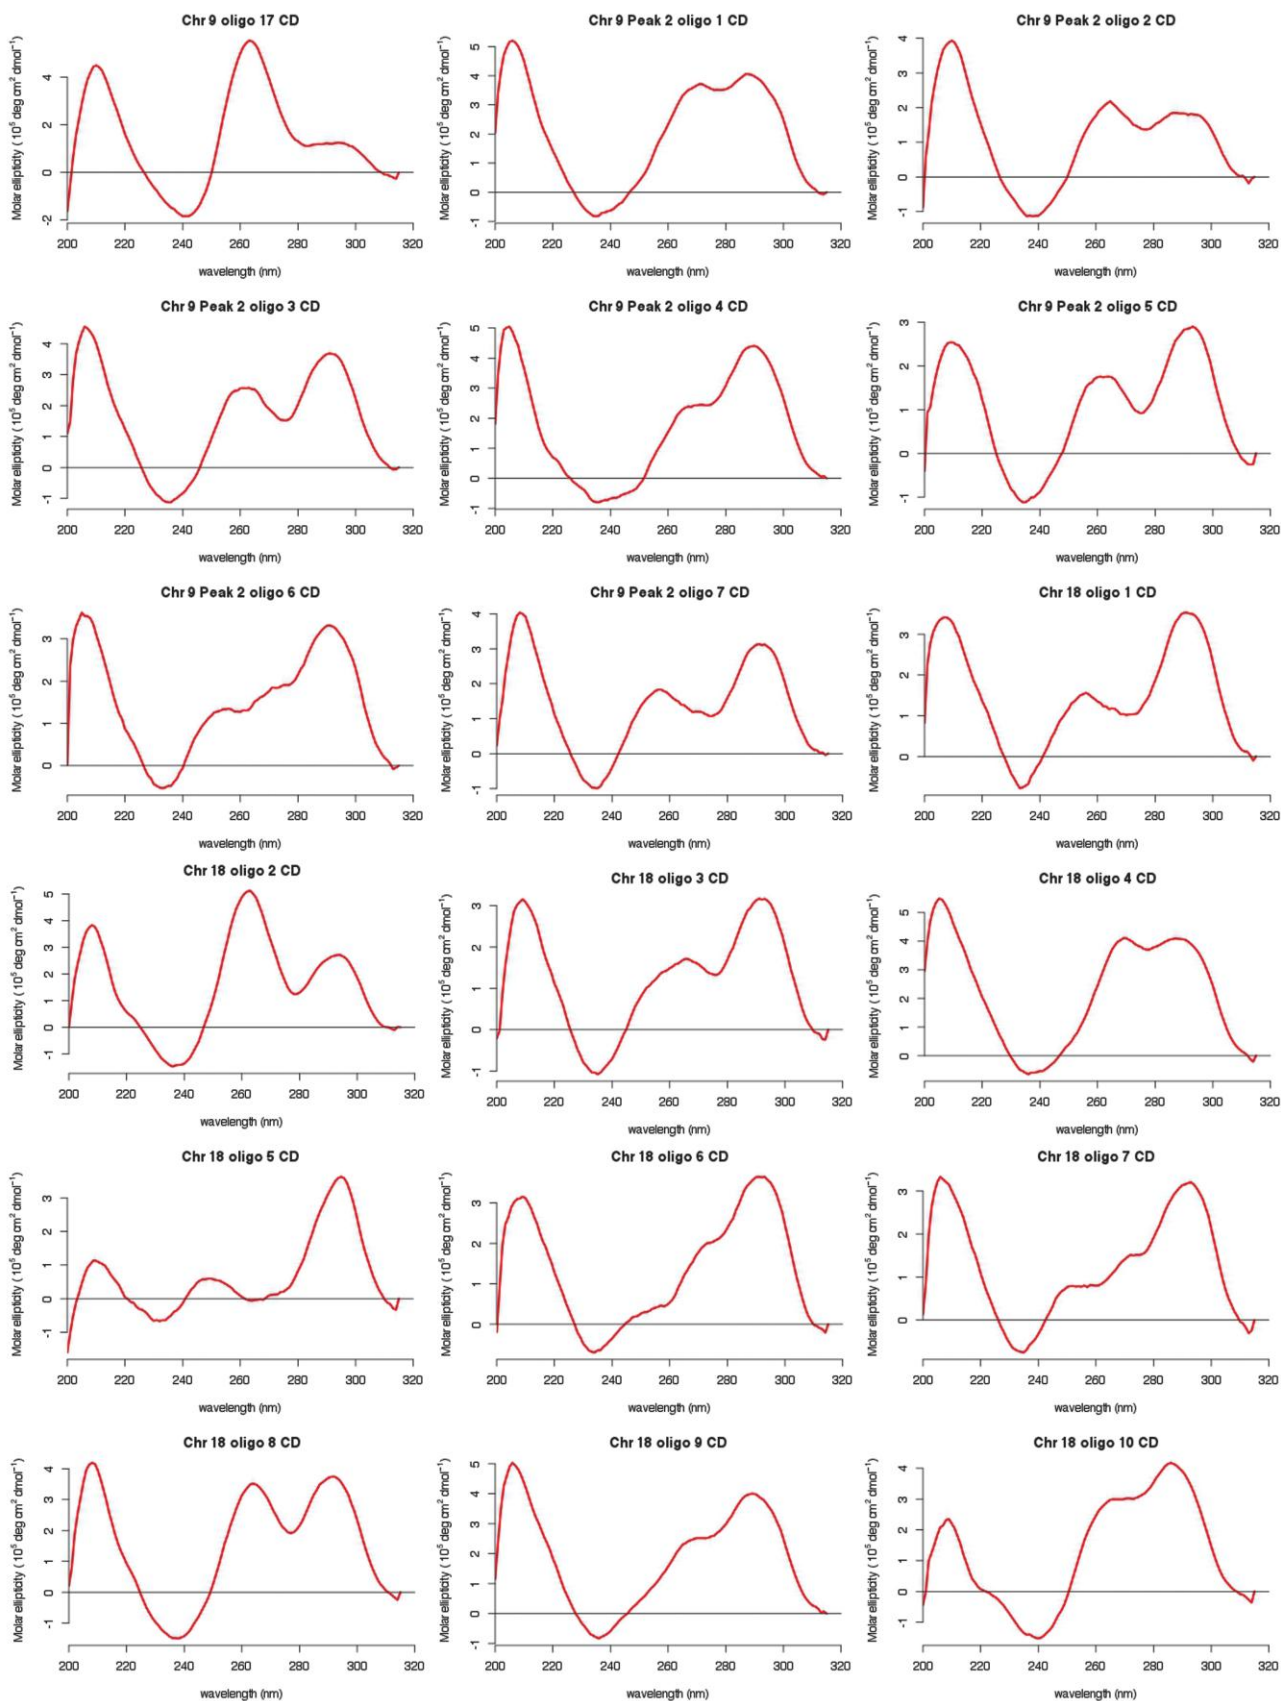

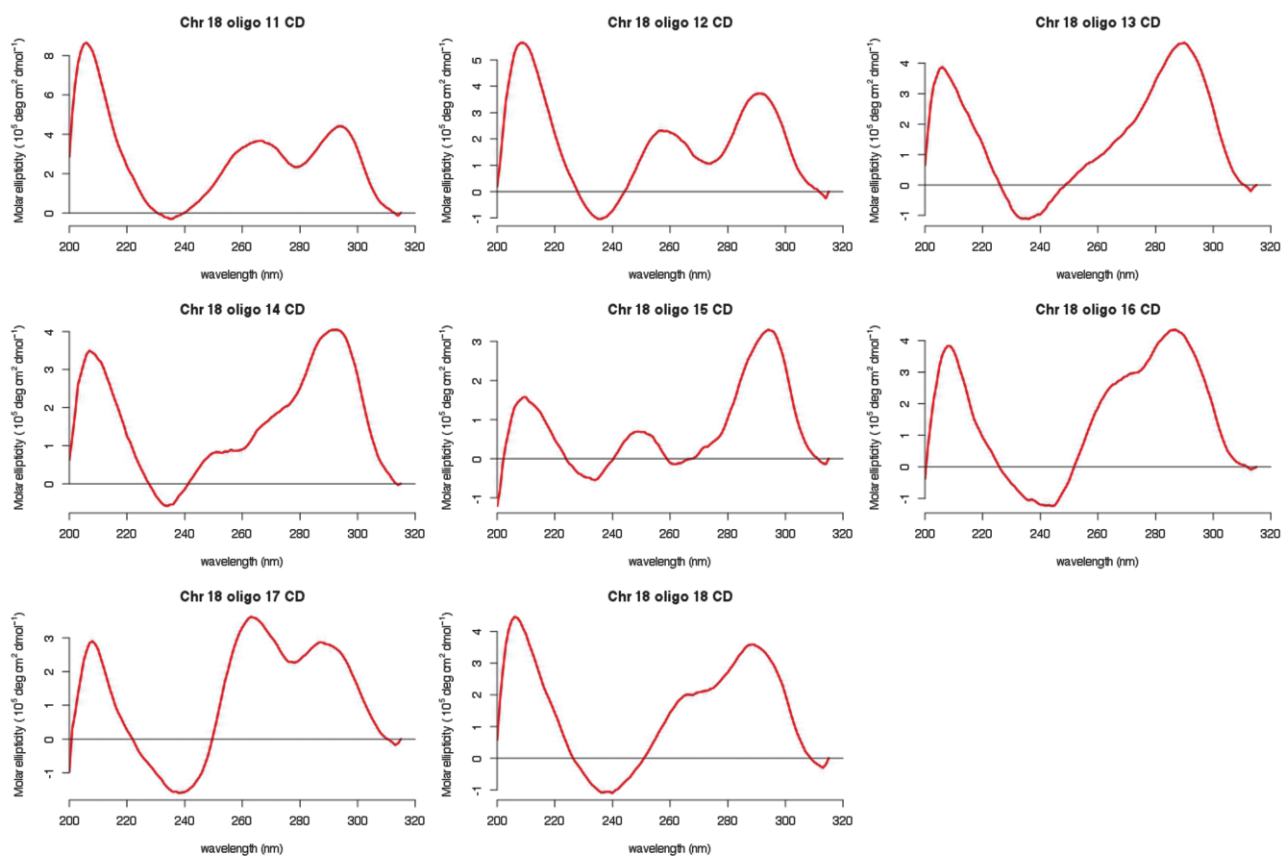

The majority of the CD spectra show characteristics of both parallel and anti-parallel G-quadruplexes, suggesting they are either hybrid G-quadruplexes or a mixture of parallel and anti-parallel G-quadruplexes.



**Supplementary Table S1** Summary of ENCODE quality metrics for four hf2 pull-down libraries.

| <b>Library</b>       | <b>No. reads</b> | <b>No. mapq<br/>≥15</b> | <b>Self cons<br/>IDR 0.02</b> | <b>SPOT</b>         | <b>NSC</b> | <b>RSC</b> | <b>PBC</b>           |
|----------------------|------------------|-------------------------|-------------------------------|---------------------|------------|------------|----------------------|
| Rep 1                | 43363413         | 21694123                | 772 (2.5)                     | 0.26                | 1.06       | 3.53       | 0.73                 |
| Rep 2                | 12312124         | 8213628                 | 485 (1.6)                     | 0.32                | 1.53       | 19.79      | 0.60                 |
| Rep 3                | 48155845         | 36225937                | 308 (1)                       | 0.55                | 1.35       | 20.77      | 0.17                 |
| Rep 4                | 2869469          | 1183304                 | -                             | 0.14                | 1.08       | 1.48       | 0.95                 |
| ENCODE<br>guidelines | -                | ≥10000000               | N in similar<br>range (<2)    | ENCODE<br>avg: 0.46 | >1.05      | >0.8       | Moderate:<br>0.5-0.8 |

The QC metrics for the libraries fall broadly within the acceptable thresholds recommended by the ENCODE consortium, and are comparable to transcription factor ChIP-Seq data<sup>53</sup>(see <http://encodeproject.org/ENCODE/qualityMetrics.html><sup>54</sup>) for the values of these metrics on the ENCODE transcription factor ChIP-Seq data). In downstream analysis, to reduce bias due to differences in library size, we down-sampled each library to 8 million reads. Note that the starting library size for replicates 2 and 4 is small giving a lower number of mapped reads. Also, the number of self-consistent peaks in replicate 1 is slightly higher then the one in other libraries while replicate 3 shows a PCR bottleneck.

No. reads: Total number of reads sequenced.

No. mapq ≥ 15: Number of reads uniquely mapped to the reference with MAPQ ≥ 15.

Self cons IDR 0.02: Self-consistent peaks with an irreproducibility discovery rate (IDR) < 0.02 (number of peaks in common between the two halves of each library). In parenthesis the ratio between the number of peaks in the library and the smallest number of peaks in any library (308). The number of self-consistent peaks should be comparable across replicates (within a factor of 2). This metric is not available for replicate 4 due to the small library size.

SPOT: Fraction of reads in enriched regions as calculated by the hotspot program (referred to as ptih by hotspot)<sup>55</sup>.

NSC: Normalized Strand Cross-correlation coefficient, a measure of enrichment derived without dependence on prior determination of enriched regions.

RSC: Relative Strand Cross-correlation coefficient, a measure of enrichment derived without dependence on prior determination of enriched regions.

PBC PCR Bottleneck Coefficient, a measure of library complexity and calculated as number of non-redundant reads (reads mapped uniquely and at different positions) / Number of uniquely mapped reads. The range 0.5-0.8 is considered a moderate bottleneck, 0-0.5 a severe bottleneck.

For more information see also <http://www.encodeproject.org/ENCODE/qualityMetrics.html#definitions><sup>54</sup>.

**Supplementary Table S2** Number of peaks called in hf2 pull-down libraries and intersecting with *G4-calculator* PQS.

|                     | <b>Number of peaks</b> | <b>Number in <i>G4-calculator</i> PQS</b> |
|---------------------|------------------------|-------------------------------------------|
| In only 1 library   | 8368                   | 4221 (50.4%)                              |
| In only 2 libraries | 503                    | 367 (72.8%)                               |
| In 3 or 4 libraries | 265                    | 201 (75.8%)                               |
| Total               | 9136                   | 4789 (52.4%)                              |

A list of peaks from the pull-down libraries was created and any peaks that overlap by at least 1 bp was combined to create a single peak, resulting in a set of peaks found in either one, two, three or all four libraries. The number of peaks in common between any two, or three or more libraries, and those present in only one library, were calculated. This resulted in 9136 peaks, of which 4789 (52.4%) contained a predicted G-quadruplex sequence.

**Supplementary Table S3** Number of peaks called in pull-down libraries and intersecting with *quadparser* PQS.

|                     | <b>Number of peaks</b> | <b>Number in <i>quadparser</i> PQS</b> |
|---------------------|------------------------|----------------------------------------|
| In only 1 library   | 8368                   | 888 (10.6%)                            |
| In only 2 libraries | 503                    | 122 (24.3%)                            |
| In 3 or 4 libraries | 265                    | 53 (20%)                               |
| Total               | 9136                   | 1063 (11.6%)                           |

A list of peaks from the pull-down libraries was created and any peaks that overlap by at least 1 bp was combined to create a single peak, resulting in a set of peaks found in either one, two, three or all four libraries. The number of peaks in common between any 2, or 3 or more libraries, and those present in only 1 library, were calculated. This resulted in 9136 peaks, of which 1063 (11.6%) overlapped with a predicted G-quadruplex sequence.

**Supplementary Table S4** The chromosomal position of the 175 peaks identified in at least two of the four libraries that overlap with PQS by *quadparser*.

| Chr   | Start     | End       | Size | Possible no. of G-quadruplexes | Possible no. of simultaneous G-quadruplexes | Feature                        |
|-------|-----------|-----------|------|--------------------------------|---------------------------------------------|--------------------------------|
| chr1  | 8         | 519       | 511  | 69                             | 18                                          | 1218bp upstream of DDX11L1     |
| chr1  | 9042368   | 9043340   | 972  | 1                              | 1                                           | Intron 1 of SLC2A5             |
| chr1  | 31676804  | 31677979  | 1175 | 46                             | 12                                          | Intron 8 of SERINC2            |
| chr1  | 41662288  | 41663564  | 1276 | 2                              | 1                                           | 53469bp downstream of EDN2     |
| chr1  | 107106987 | 107110502 | 3515 | 1                              | 1                                           | 290288bp upstream of PRMT6     |
| chr1  | 113933419 | 113934116 | 697  | 1                              | 1                                           | Intron 4 of MAGI3              |
| chr1  | 114397764 | 114399220 | 1456 | 1                              | 1                                           | 34217bp downstream of SYT6     |
| chr1  | 114562519 | 114563649 | 1130 | 1                              | 1                                           | 64525bp upstream of SYT6       |
| chr1  | 143769360 | 143770576 | 1216 | 4                              | 1                                           | Intron 7 of PDE4DIP            |
| chr1  | 158370228 | 158370921 | 693  | 1                              | 1                                           | Intron 13 of ATP1A2            |
| chr1  | 179662391 | 179663354 | 963  | 9                              | 5                                           | 55955bp upstream of CACNA1E    |
| chr1  | 200859764 | 200861200 | 1436 | 2                              | 2                                           | Intron 1 of SYT2               |
| chr1  | 205163381 | 205165054 | 1673 | 1                              | 1                                           | 1381bp upstream of FAIM3       |
| chr1  | 226321620 | 226326612 | 4992 | 2                              | 1                                           | 6026bp downstream of WNT3A     |
| chr1  | 227180015 | 227180595 | 580  | 1                              | 1                                           | 230977bp downstream of RHOU    |
| chr10 | 99820     | 100673    | 853  | 19                             | 7                                           | 14643bp upstream of TUBB8      |
| chr10 | 3274083   | 3275206   | 1123 | 2                              | 1                                           | 69051bp upstream of PITRM1     |
| chr10 | 5529186   | 5530438   | 1252 | 1                              | 1                                           | 220bp downstream of CALML5     |
| chr10 | 8549891   | 8550961   | 1070 | 1                              | 1                                           | 392722bp downstream of GATA3   |
| chr10 | 11365225  | 11367034  | 1809 | 1                              | 1                                           | Intron 8 of CELF2              |
| chr10 | 129485296 | 129486119 | 823  | 8                              | 5                                           | 55857bp downstream of FOXI2    |
| chr10 | 132478284 | 132480482 | 2198 | 4                              | 3                                           | 170359bp downstream of MIR378C |
| chr10 | 134545250 | 134545875 | 625  | 1                              | 1                                           | Intron 27 of TTC40             |
| chr10 | 135229754 | 135231090 | 1336 | 23                             | 9                                           | Exon 2 of SPRNP1               |
| chr11 | 2104287   | 2105240   | 953  | 12                             | 6                                           | 1678bp downstream of INS-IGF2  |
| chr11 | 17741532  | 17742603  | 1071 | 1                              | 1                                           | Intron 1 of KCNC1              |

|       |           |           |      |    |   |                                   |
|-------|-----------|-----------|------|----|---|-----------------------------------|
| chr11 | 59293690  | 59294679  | 989  | 1  | 1 | Intron 1 of STX3                  |
| chr11 | 68340473  | 68341539  | 1066 | 1  | 1 | Intron 1 of CPT1A                 |
| chr11 | 69021482  | 69022975  | 1493 | 1  | 1 | 142079bp upstream of CCND1        |
| chr11 | 70469951  | 70470667  | 716  | 4  | 4 | Intron 7 of SHANK2                |
| chr11 | 70828658  | 70829373  | 715  | 2  | 2 | Intron 6 of DHCR7                 |
| chr12 | 120672689 | 120673517 | 828  | 17 | 9 | Exon and intron 4 of TMEM120B     |
| chr12 | 129489606 | 129490677 | 1071 | 10 | 5 | Intron 8 of RIMBP2                |
| chr13 | 19864378  | 19866450  | 2072 | 3  | 1 | 9356bp downstream of CRYL1        |
| chr13 | 28963008  | 28964794  | 1786 | 1  | 1 | Intron 9 of MTUS2                 |
| chr13 | 30314309  | 30317148  | 2839 | 4  | 1 | 31528bp downstream of LINC00398   |
| chr13 | 113635573 | 113636613 | 1040 | 1  | 1 | Intron 3 of FAM70B                |
| chr14 | 99703356  | 99704959  | 1603 | 4  | 3 | 7592bp upstream of DEGS2          |
| chr14 | 104223054 | 104223970 | 916  | 6  | 4 | 3018bp upstream of INF2           |
| chr14 | 105100301 | 105101980 | 1679 | 15 | 9 | 32718bp downstream of TMEM121     |
| chr14 | 105106275 | 105108635 | 2360 | 1  | 1 | 38692bp downstream of TMEM121     |
| chr14 | 105202820 | 105204090 | 1270 | 2  | 2 | 2869bp downstream of ELK2AP       |
| chr14 | 105220341 | 105221616 | 1275 | 12 | 8 | 10153bp upstream of ELK2AP        |
| chr14 | 105226011 | 105228871 | 2860 | 1  | 1 | 15823bp upstream of ELK2AP        |
| chr14 | 105275354 | 105277318 | 1964 | 2  | 2 | 65166bp upstream of ELK2AP        |
| chr15 | 28252133  | 28252958  | 825  | 2  | 2 | 22573bp upstream of DKFZP434L187  |
| chr15 | 38129839  | 38130686  | 847  | 1  | 1 | Intron 2 of NR_040062             |
| chr15 | 77171121  | 77172372  | 1251 | 1  | 1 | 852bp upstream of RASGRF1         |
| chr15 | 77531162  | 77532163  | 1001 | 1  | 1 | Intron 1 of KIAA1024              |
| chr16 | 967660    | 968443    | 783  | 4  | 1 | Intron 3 of LMF1                  |
| chr16 | 10041147  | 10042110  | 963  | 1  | 1 | Intron 2 of GRIN2A                |
| chr16 | 26292786  | 26293697  | 911  | 2  | 2 | 236277bp downstream of HS3ST4     |
| chr16 | 28007581  | 28009051  | 1470 | 9  | 4 | 7766bp downstream of XPO6         |
| chr16 | 29963847  | 29964796  | 949  | 1  | 1 | 7116bp upstream of ALDOA          |
| chr16 | 71842895  | 71843546  | 651  | 2  | 1 | 134659bp upstream of LOC100506172 |
| chr16 | 71877818  | 71879596  | 1778 | 3  | 2 | 98609bp upstream of LOC100506172  |
| chr16 | 78416324  | 78417106  | 782  | 1  | 1 | 224202bp upstream of MAF          |

|        |          |          |      |     |    |                                 |
|--------|----------|----------|------|-----|----|---------------------------------|
| chr16  | 83521280 | 83522414 | 1134 | 32  | 12 | 20664bp downstream of CRISPLD2  |
| chr16  | 84162831 | 84164170 | 1339 | 1   | 1  | 38360bp upstream of KIAA0182    |
| chr16  | 85293975 | 85294735 | 760  | 8   | 4  | 121171bp downstream of FOXL1    |
| chr16  | 85500290 | 85501114 | 824  | 1   | 1  | 327486bp downstream of FOXL1    |
| chr16  | 85563243 | 85564448 | 1205 | 6   | 3  | 329457bp downstream of C16orf95 |
| chr16  | 86115229 | 86116480 | 1251 | 2   | 1  | 32269bp upstream of ZCCHC14     |
| chr16  | 87113048 | 87114877 | 1829 | 14  | 6  | Intron 4 of ZFPM1               |
| chr16  | 87605071 | 87606830 | 1759 | 3   | 1  | 34067bp upstream of CBFA2T3     |
| chr16  | 88228335 | 88229442 | 1107 | 8   | 3  | Intron 2 of DPEP1               |
| chr17  | 7018376  | 7019958  | 1582 | 1   | 1  | Intron 2 of ASGR1               |
| chr17  | 9070925  | 9072004  | 1079 | 1   | 1  | Intron 6 of NTN1                |
| chr17  | 21079212 | 21080502 | 1290 | 4   | 2  | 2274bp downstream of C17orf103  |
| chr17  | 21250806 | 21252490 | 1684 | 3   | 3  | Intron 1 of KCNJ12              |
| chr17  | 54350821 | 54353967 | 3146 | 1   | 1  | Intron 1 of PPM1E               |
| chr17  | 55561798 | 55563216 | 1418 | 1   | 1  | 18868bp upstream of CA4         |
| chr17  | 55928915 | 55935478 | 6563 | 1   | 1  | Exon 2 of APPBP2                |
| chr17  | 56703580 | 56707890 | 4310 | 1   | 1  | Intron 23 of BCAS3              |
| chr17  | 56976149 | 56984472 | 8323 | 1   | 1  | 38104bp downstream of NACA2     |
| chr17  | 58165206 | 58165845 | 639  | 1   | 1  | Intron 6 of MARCH10             |
| chr17  | 60926093 | 60927420 | 1327 | 1   | 1  | 27725bp downstream of AXIN2     |
| chr17  | 62452279 | 62453637 | 1358 | 1   | 1  | Intron 3 of CACNG4              |
| chr17  | 77013084 | 77014744 | 1660 | 10  | 3  | Intron 1 of BAHCC1              |
| chr17  | 77535787 | 77536782 | 995  | 6   | 3  | Intron 3 of ASPSCR1             |
| chr18  | 53391    | 54431    | 1040 | 35  | 11 | 44634bp upstream of ROCK1P1     |
| chr18  | 74466821 | 74468208 | 1387 | 1   | 1  | 373055bp upstream of SALL3      |
| chr18* | 2        | 789      | 787  | 102 | 26 | 98276bp upstream of ROCK1P1     |
| chr19  | 196333   | 197139   | 806  | 45  | 14 | 34905bp downstream of PPAP2C    |
| chr19  | 52684952 | 52685598 | 646  | 1   | 1  | Intron 9 of NAPA                |
| chr19  | 59328816 | 59329791 | 975  | 8   | 5  | 1855bp downstream of PRPF31     |
| chr19  | 63789576 | 63790088 | 512  | 21  | 6  | 2003bp downstream of MGC2752    |
| chr2   | 7        | 799      | 792  | 57  | 17 | 28015bp downstream of FAM110C   |

|       |           |           |      |     |    |                                           |
|-------|-----------|-----------|------|-----|----|-------------------------------------------|
| chr2  | 67294386  | 67295929  | 1543 | 1   | 1  | Intron 1 of LOC644838                     |
| chr2  | 71698006  | 71699580  | 1574 | 1   | 1  | Intron 40 of DYSF                         |
| chr2  | 91408643  | 91409274  | 631  | 10  | 4  | 74764bp downstream of GGT8P               |
| chr2  | 114076583 | 114077750 | 1167 | 107 | 31 | Exon and Intron 1 of DDX11L2              |
| chr2  | 121607959 | 121608989 | 1030 | 1   | 1  | 81645bp downstream of TFCP2L1             |
| chr2  | 240735321 | 240736372 | 1051 | 2   | 1  | 6576bp upstream of OTOS                   |
| chr20 | 28259785  | 28261460  | 1675 | 3   | 3  | 7987bp upstream of MLLT10P1               |
| chr20 | 45239349  | 45242327  | 2978 | 12  | 5  | Intron 12 of EYA2                         |
| chr20 | 45248764  | 45254467  | 5703 | 1   | 1  | Exon 16 of EYA2                           |
| chr20 | 45467778  | 45470464  | 2686 | 1   | 1  | 48898bp upstream of ZMYND8                |
| chr20 | 45492655  | 45496322  | 3667 | 1   | 1  | 67686bp upstream of NCOA3                 |
| chr20 | 45602175  | 45604933  | 2758 | 18  | 5  | Intron 1 of NCOA3                         |
| chr20 | 46511302  | 46512503  | 1201 | 11  | 5  | 78515bp downstream of LINC00494           |
| chr20 | 46738917  | 46740334  | 1417 | 2   | 2  | Intron 9 of PREX1                         |
| chr20 | 46855288  | 46859216  | 3928 | 3   | 2  | Intron 1 of PREX1                         |
| chr20 | 46887904  | 46889539  | 1635 | 1   | 1  | 10078bp upstream of PREX1                 |
| chr20 | 46923635  | 46925834  | 2199 | 3   | 1  | 45809bp upstream of PREX1                 |
| chr20 | 48784912  | 48792215  | 7303 | 1   | 1  | Exon 2 of PARD6B                          |
| chr20 | 51746773  | 51752096  | 5323 | 1   | 1  | 113731bp upstream of ZNF217               |
| chr20 | 52518710  | 52524246  | 5536 | 2   | 2  | 1427bp upstream of DOK5                   |
| chr20 | 52977654  | 52979623  | 1969 | 2   | 1  | 276538bp downstream of DOK5               |
| chr20 | 55039856  | 55041017  | 1161 | 1   | 1  | 136199bp downstream of BMP7               |
| chr20 | 55425486  | 55426232  | 746  | 2   | 2  | 7695bp downstream of RBM38                |
| chr20 | 55668405  | 55669679  | 1274 | 2   | 1  | Intron 1 of PMEPA1                        |
| chr20 | 55982590  | 55984285  | 1695 | 1   | 1  | 78685bp downstream of MIR4532             |
| chr20 | 56528113  | 56529073  | 960  | 8   | 4  | Intron 2 of LOC149773                     |
| chr20 | 56751874  | 56753431  | 1557 | 5   | 2  | 27568bp downstream of NPEPL1,STX16-NPEPL1 |
| chr20 | 57646617  | 57648176  | 1559 | 3   | 3  | Intron 1 of PHACTR3                       |
| chr20 | 58508632  | 58510305  | 1673 | 5   | 3  | 21999bp downstream of MIR4533             |
| chr20 | 58772085  | 58773473  | 1388 | 1   | 1  | 285452bp downstream of MIR4533            |

|       |           |           |      |     |    |                                   |
|-------|-----------|-----------|------|-----|----|-----------------------------------|
| chr20 | 62388336  | 62389608  | 1272 | 97  | 29 | 2574bp upstream of LINC00266-1    |
| chr21 | 40279061  | 40280278  | 1217 | 1   | 1  | 25935bp downstream of DSCAM       |
| chr21 | 43452868  | 43453992  | 1124 | 5   | 2  | 8218bp upstream of CRYAA          |
| chr21 | 43466670  | 43467170  | 500  | 1   | 1  | 689bp downstream of CRYAA         |
| chr21 | 43711963  | 43713103  | 1140 | 1   | 1  | Intron 3 of LINC00313             |
| chr21 | 45228050  | 45228831  | 781  | 14  | 5  | 5376bp downstream of LINC00163    |
| chr22 | 43109232  | 43110876  | 1644 | 2   | 1  | 69169bp upstream of KIAA1644      |
| chr3  | 14270948  | 14272195  | 1247 | 1   | 1  | 56076bp downstream of LSM3        |
| chr3  | 134617828 | 134619365 | 1537 | 1   | 1  | Intron 1 of BFSP2                 |
| chr3  | 197905523 | 197907044 | 1521 | 16  | 10 | 10501bp downstream of CEP19       |
| chr3  | 199383862 | 199386032 | 2170 | 146 | 44 | Intron 6 of FAM157A               |
| chr3* | 10889757  | 10890887  | 1130 | 4   | 2  | Intron 5 of SLC6A11               |
| chr4  | 9         | 366       | 357  | 24  | 7  | 42861bp upstream of ZNF595        |
| chr4  | 688654    | 689387    | 733  | 18  | 8  | 186bp upstream of PCGF3           |
| chr4  | 1623428   | 1624722   | 1294 | 1   | 1  | Intron 6 of FAM53A                |
| chr4  | 3549463   | 3550658   | 1195 | 1   | 1  | Intron 1 of FLJ35424              |
| chr4  | 7692045   | 7692700   | 655  | 1   | 1  | Intron 4 of SORCS2                |
| chr4  | 37921144  | 37922210  | 1066 | 1   | 1  | 103954bp downstream of TBC1D1     |
| chr4  | 169836325 | 169837467 | 1142 | 2   | 1  | Intron 3 of PALLD                 |
| chr5  | 398015    | 399095    | 1080 | 2   | 2  | Intron 2 of AHRR                  |
| chr5  | 637777    | 638547    | 770  | 2   | 2  | 26858bp upstream of CEP72         |
| chr5  | 1036358   | 1037195   | 837  | 1   | 1  | 4230bp downstream of LOC100506688 |
| chr5  | 1094591   | 1102038   | 7447 | 1   | 1  | 1451bp downstream of SLC12A7      |
| chr5  | 11364409  | 11365512  | 1103 | 11  | 4  | Intron 9 of CTNND2                |
| chr5  | 11495798  | 11496702  | 904  | 2   | 1  | Intron 3 of CTNND2                |
| chr5  | 170958025 | 170959090 | 1065 | 1   | 1  | 140791bp downstream of FGF18      |
| chr5  | 176189693 | 176190793 | 1100 | 1   | 1  | Intron 1 of UNC5A                 |
| chr5  | 177907130 | 177907912 | 782  | 20  | 8  | Intron 2 of COL23A1               |
| chr5  | 178304828 | 178305503 | 675  | 1   | 1  | Intron 2 of ZNF454                |
| chr5  | 179954198 | 179955353 | 1155 | 9   | 5  | 3106bp upstream of SCGB3A1        |
| chr6  | 3721808   | 3722556   | 748  | 1   | 1  | 24564bp upstream of PXDC1         |



|       |           |           |      |    |    |                                    |
|-------|-----------|-----------|------|----|----|------------------------------------|
| chr6  | 43813676  | 43814720  | 1044 | 2  | 2  | 31204bp upstream of VEGFA          |
| chr7  | 284572    | 285283    | 711  | 1  | 1  | 2769bp upstream of FAM20C          |
| chr7  | 1585592   | 1586639   | 1047 | 1  | 1  | Intron 3 of KIAA1908               |
| chr7  | 1762046   | 1763079   | 1033 | 4  | 1  | 7931bp downstream of ELFN1         |
| chr7  | 76463952  | 76466431  | 2479 | 3  | 3  | Intron 2 of DTX2P1-UPK3BP1-PMS2P11 |
| chr7  | 98381793  | 98382517  | 724  | 2  | 1  | Intron 32 of TRRAP                 |
| chr7  | 150237585 | 150238894 | 1309 | 1  | 1  | 34083bp downstream of KCNH2        |
| chr7  | 150525496 | 150526443 | 947  | 3  | 2  | 9413bp downstream of ABCF2         |
| chr7  | 154629961 | 154631827 | 1866 | 10 | 5  | 88592bp upstream of INSIG1         |
| chr7  | 156784071 | 156785423 | 1352 | 2  | 1  | 29245bp downstream of UBE3C        |
| chr8  | 82916991  | 82917900  | 909  | 6  | 2  | Exon 1 of SNX16                    |
| chr8  | 102733468 | 102734329 | 861  | 1  | 1  | Intron 14 of GRHL2                 |
| chr8  | 125818323 | 125819253 | 930  | 2  | 2  | 8413bp upstream of MTSS1           |
| chr8  | 129637743 | 129638857 | 1114 | 1  | 1  | 406128bp downstream of MIR1208     |
| chr8  | 134485671 | 134486724 | 1053 | 1  | 1  | 49549bp downstream of ST3GAL1      |
| chr8  | 143574081 | 143575023 | 942  | 3  | 3  | Intron 16 of BAI1                  |
| chr8  | 143821463 | 143823604 | 2141 | 5  | 3  | 633bp upstream of SLURP1           |
| chr8  | 144545239 | 144546104 | 865  | 1  | 1  | 7707bp downstream of RHPN1         |
| chr9  | 67906956  | 67910038  | 3082 | 1  | 1  | 7565bp downstream of LOC642236     |
| chr9  | 89436616  | 89438253  | 1637 | 2  | 1  | Intron 3 of DAPK1                  |
| chr9  | 123697261 | 123698412 | 1151 | 1  | 1  | Intron 6 of TTLL11                 |
| chr9  | 136685978 | 136686856 | 878  | 7  | 5  | Intron 1 of COL5A1                 |
| chr9  | 137805634 | 137806436 | 802  | 1  | 1  | Intron 19 of KCNT1                 |
| chr9* | 5         | 634       | 629  | 68 | 18 | 1353bp upstream of DDX11L5         |
| chr9* | 140173853 | 140174454 | 601  | 19 | 7  | Intron 1 of TUBBP5                 |
| chrX  | 67789045  | 67790557  | 1512 | 1  | 1  | Intron 1 of STARD8                 |

The number of predicted G-quadruplexes and the nearest gene are shown. \* denotes peaks analyzed by CD in **Supplementary Figure 12**.

**Supplementary Table S5** Oligonucleotide sequences analyzed by circular dichroism

|                        |                          |
|------------------------|--------------------------|
| chr9 CD oligo1         | GGGTGAGGGTGAGGGTGGGG     |
| chr9 CD oligo2         | GGGGGTGGGGTTGGGGTTGGGG   |
| chr9 CD oligo3         | GGGGTTAGGGTTCGGGTCGGG    |
| chr9 CD oligo4         | GGGTTCTGGGTTCTGGGTTCTGGG |
| chr9 CD oligo5         | GGGTTGGGTTAGGGTTAGGG     |
| chr9 CD oligo6         | GGGTAGGGTTAGGGTTAGGG     |
| chr9 CD oligo7         | GGGTTTAGGGTTTAGGGTTAGGG  |
| chr9 CD oligo8         | GGGGTTAGGGTTAGGGTTAGGG   |
| chr9 CD oligo9         | GGGTTAGGGTTAGGGTTAGGG    |
| chr9 CD oligo10        | GGGGTTAGGGTTAGGGTTAGGG   |
| chr9 CD oligo11        | GGGTTAGGGTTAGGGTTAAGGG   |
| chr9 CD oligo12        | GGGGTTAGGGTTAGGGTTAGGG   |
| chr9 CD oligo13        | GGGTAGGGTTAGGGTGAGGG     |
| chr9 CD oligo14        | GGGTGAGGGTGAGGGTGAGGG    |
| chr9 CD oligo15        | GGGTGAGGGTTGGGTTAGGG     |
| chr9 CD oligo16        | GGGTTAGGGTTGGGTTAGGG     |
| chr9 CD oligo17        | GGGTTAGGGTTGGGTTGGGG     |
| chr18 CD oligo 1       | GGGTGAGGGTTAGGGTTAGGG    |
| chr18 CD oligo 2       | GGGGTAGGGTAGGGTAGGG      |
| chr18 CD oligo 3       | GGGGTAGGGTTAGGGTTAGGG    |
| chr18 CD oligo 4       | GGGTTAAGGGTTAGGGTTAGGG   |
| chr18 CD oligo 5       | GGGTTAGGGTAGGGTAGGG      |
| chr18 CD oligo 6       | GGGTAGGGTTAGGGTTAGGG     |
| chr18 CD oligo 7       | GGGTTAGGGTTAGGGTTAGGG    |
| chr18 CD oligo 8       | GGGTAGGGTTAGGGTTAGGG     |
| chr18 CD oligo 9       | GGGGTTTAGGGTTAGGGTTAGGG  |
| chr18 CD oligo 10      | GGGTAGGGTTGGGGTTGGGG     |
| chr18 CD oligo 11      | GGGGTTGGGGTTGGGGTTGGGG   |
| chr18 CD oligo 12      | GGGGTTGGGGTAGGGTTAGGG    |
| chr18 CD oligo 13      | GGGTTAGGGTTAAGGGTTAGGG   |
| chr18 CD oligo 14      | GGGTTAGGGTTAGGGTAGGG     |
| chr18 CD oligo 15      | GGGTTAGGGTAGGGTTAGGG     |
| chr18 CD oligo 16      | GGGTTAGGGTAGGGTTAGGG     |
| chr18 CD oligo 17      | GGGTTGGGGTTGGGGTTGGGG    |
| chr18 CD oligo 18      | GGGTTAGGGTTAGGGTAAGGG    |
| chr3 CD oligo 1        | GGGTAGGGTAGGGTAGGG       |
| chr3 CD oligo 2        | GGGTAGGGTATGGTAGGGTAGGG  |
| chr9 Peak 2 CD oligo 1 | GGGTTAAGGGTTAGGGTGAGGG   |
| chr9 Peak 2 CD oligo 2 | GGGTGAGGGTTAGGGTTAGGG    |
| chr9 Peak 2 CD oligo 3 | GGGTTAGGGCTAGGGTTGGGG    |
| chr9 Peak 2 CD oligo 4 | GGGTTAAGGGTTGGGGTTGGGG   |
| chr9 Peak 2 CD oligo 5 | GGGTTAGGGTTAGGGTAAGGG    |
| chr9 Peak 2 CD oligo 6 | GGGTTAGGGTTTGGGTTAGGG    |
| chr9 Peak 2 CD oligo 7 | GGGGTTAGGGCTAGGGCTAGGG   |

### Supplementary References:

- 53 Landt, S. G. *et al. Genome Res* **22**, 1813-1831, (2012).
- 54 *Quality Metrics*, <<http://encodeproject.org/ENCODE/qualityMetrics.html>> (2012).
- 55 John, S. *et al. Nature genetics* **43**, 264-268, (2011).
- 56 Li, Q. H., Brown, J. B., Huang, H. Y. & Bickel, P. J. *Ann Appl Stat* **5**, 1752-1779, (2011).
